# Supplementary material for: In silico PCR analysis: a comprehensive bioinformatics tool for enhancing nucleic acid amplification assays
Source: Front Bioinform. 2024 Oct 7;4:1464197. doi: 10.3389/fbinf.2024.1464197 (PMC11491563; doi:10.3389/fbinf.2024.1464197)
Supplement: Supplementary file 1 [file Table1.xlsx]

## Sheet: LTR_primers
Name	Sequence	LTR Source	Length	Tm(°C)	GC(%)	dG(kcal/mol)	dH(kcal/mol)	dS(cal/mol K)	Linguistic Complexity (%)	Primer Efficiency (%)	in silico IRAP (number of amplicons)
4303	gacgtcctcttgcttccgtaagg	Huck	23	65.7	56.5	-29.8	-183.4	-518.2	88	89	10
4304	tgtcgagtccttgctgacgt	Huck	20	64.3	55	-26.5	-157.6	-442.5	84	95	13
4305	agaggttttggcaccctgttcg	Huck	22	66.1	54.5	-28.9	-172.1	-483.8	88	93	1
4306	attactcgtcggtccagggac	Huck	21	64.4	57.1	-27.1	-163.6	-461	87	94	19
4307	acgcctataaaaggaaggtcca	Huck	22	61.7	45.5	-26.5	-166.1	-472.1	88	73	4
4308	cactcggtctaagtgaccgt	Ji	20	62	55	-25.4	-156.9	-443.7	92	48	30
4309	gacccggtctttgtgaccac	Ji	20	64	60	-26.3	-158.1	-444.8	82	82	144
4310	ttgtgaccacctcaacggggag	Ji	22	67.6	59.1	-29.4	-171.8	-481.2	88	82	75
4311	ttgcaagaaccgaacctcggta	Ji	22	64.7	50	-28.3	-171.6	-484	90	66	70
4312	tgtgttgggcaattcaacca	Ji	20	61.1	45	-24.9	-152.4	-431	82	73	275
4313	caagtaccactaatcactggagc	Opie	23	61.2	47.8	-27.3	-178.2	-509.5	90	77	4
4314	tcccttggccgctcataacc	Opie	20	65.6	60	-26.8	-155.4	-434.8	92	79	9
4315	tcataaccgcgagcacggctgat	Opie	23	69.4	56.5	-31.9	-184.6	-515.7	95	100	5
4316	atcctgtttggctgtagtggac	Opie	22	63	50	-27.2	-169	-479.1	85	87	8
4317	gttcgcattcggtttgcctt	Opie	20	62.4	50	-26	-159.1	-449	79	91	51
4318	gtttgccttctaaaaccgggt	Opie	21	61.6	47.6	-26	-162.1	-459.8	87	66	27
4319	tgatgtgtactcacccttgc	Opie	20	60.3	50	-24.5	-153.8	-436.6	87	87	100
4320	ggtgtgcggtcggacccaa	Grande1-4	19	68.8	68.4	-27.5	-152	-420.5	78	92	8
4321	aagcatactcaccaggacgt	Grande1-4	20	61.6	50	-25	-153	-432.5	95	90	1
4322	gcatctctaagcggcccgaacctg	Grande1-4	24	70.5	62.5	-33.3	-193.8	-541.8	93	92	8
4323	ctaggccttatatactcgaccgt	Grande1-4	23	61.2	47.8	-27.2	-176.5	-504.5	88	78	6
4324	ggctccagcgcgggaaagtc	Grande1-4	20	69.7	70	-29.1	-163.1	-452.2	84	80	0
4325	gtgggtaaagttgtaccacctc	Tekay	22	61.2	50	-26.4	-169.6	-483.5	85	70	0
4326	ccctggaaccgggtgtgaca	Tekay	20	67.9	65	-27.6	-155.9	-433.6	82	88	0
4327	gtggaaatggatcctggcac	Tekay	20	61.9	55	-25.3	-155	-438.3	82	91	1
4328	cagagccatgatagcactcgtgg	Tekay	23	65.9	56.5	-29.9	-182.7	-515.9	93	90	2
4329	ttatcctgggtggtcactccatgttc	Tekay	26	66.7	50	-32.3	-199.5	-565.3	82	70	3
4330	ttacccacaagccatgtatcc	Tekay	21	60.4	47.6	-25.2	-159.2	-453	87	82	2
4331	gcatttgagaacaagtcccca	Cinful1	21	61.3	47.6	-25.8	-161.2	-457.5	87	76	209
4332	acaattatgcccctcataaaagtttaca	Cinful1	28	61.3	32.1	-31.1	-210.7	-607.4	85	28	2

## Sheet: MITE_primers
seq_id	sequence
mite_athos	tactccctccgttcc
trep1122	tactccctctattcc
trep1557	tactccctccgtttc
trep744	tacttcctccgtttc
trep2043	tactccttccgttcc
trep2100	tactcccccctttcc
trep1559	tactcccttcgtttc
trep1139	tactccctccgattc
trep745	tactccctccgtttt
trep1129	tactcccttcctttc
trep2095	cactccatccgtttt
trep1140	tactccctcgttcc
trep813	tactccctttgtttc
trep1132	tactcactccgtttc
trep1155	tactccccccgttcc
trep1156	tactccatccgttct
trep1159	tactccctccattcc
trep1149	tactccctccgtttg
trep1143	tactcatcccgttcc
trep1131	tactccctccgttcg
trep743	tactcgctccgttcc
trep1141	tacttcctctgttcc
trep2099	tactgcctccatcct
trep2354	tgctctttgcgttat
trep2101	tactttctccgttcc
4_trep2044	tactccctccgtacc
5_trep1558	tactccctccgttac
7_trep744	tacttcctccgttcc
15_trep204	tactccccccgtttc
17_trep155	tactccctccgtccc
27_trep113	tgctccctccgttcc
60_trep745	tactccctccgttct
20_trep209	tacttcatttgttct
50_trep113	tactccctccgttca
47_trep115	tattccctccgtttc
45_trep115	tactccatccgttcc
55_trep115	tactccctctgttcc
34_trep114	tcctccctccgttcc
31_trep113	tactccctccggttc
58_trep165	tactccttccgtttc
61_trep209	tactccctctgtttc
62_trep235	tacaccttccgtttt
trep2097	taccctctccgtttt
trep2102	tactccatccatttc
trep2223	tactccctccatttc
71_trep222	taatcctccttttca

## Sheet: TableS1
Table S1: Comparison of in silico PCR tool with amplicon analysis (Number of Matches) from NCBI BLAST.
	Arabidopsis thaliana
	Chromosome (Sequence ID):	1 (LR797787.1)	2 (LR797788.1)	3 (LR797789.1)	4 (LR797790.1)	5 (LR797791.1)	mitochondria	chloroplast	total
Number of Matches:	NCBI BLAST:	9	4	15	10	0	0	0	38
Number of Matches (Sequence ID): amplicons size	In silico PCR tool:	13	12	17	12	8	0	0	62
	Brachypodium distachyon
	Chromosome (Sequence ID):	1 (NC_016131.3)	2 (NC_016132.3)	3 (NC_016133.3)	4 (NC_016134.3)	5 (NC_016135.3)	mitochondria	chloroplast	total
Number of Matches:	NCBI BLAST:	85	57	40	88	42	0	0	312
Number of Matches (amplicons size):	In silico PCR tool:	124	109	108	102	66	0	0	509
	Zea mays
	Chromosome (Sequence ID):	1 (NC_050096.1)	2 (NC_050097.1)	3 (NC_050098.1)	4 (NC_050099.1)	5 (NC_050100.1)	6 (NC_050101.1)	7 (NC_050102.1)	8 (NC_050103.1)	9 (NC_050104.1)	10 (NC_050105.1)	mitochondria	chloroplast	total
Number of Matches:	NCBI BLAST:	6038	4201	4161	4052	4184	3112	3112	3381	2783	2627	0	0	37651
Number of Matches (Sequence ID): amplicons size	In silico PCR tool:	6319	4477	4382	4267	4312	3275	3267	3571	3028	2812	0	0	39710
	Capsicum annuum
	Chromosome (Sequence ID):	1 (CM008455.1)	2 (CM008456.1)	3 (CM008457.1)	4 (CM008458.1)	5 (CM008459.1)	6 (CM008460.1)	7 (CM008461.1)	8 (CM008462.1)	9 (CM008463.1)	10 (CM008464.1)	11 (CM008465.1)	12 (CM008466.1)	mitochondria	chloroplast	total
Number of Matches:	NCBI BLAST:	775	442	609	485	508	592	539	262	539	442	479	574	0	0	6246
Number of Matches (Sequence ID): amplicons size	In silico PCR tool:	472	260	367	300	326	322	321	106	291	280	336	366	0	0	3747
	Hordeum vulgare
	Chromosome (Sequence ID):	1 (NC_058518.1)	2 (NC_058519.1)	3 (NC_058520.1)	4 (NC_058521.1)	5 (NC_058522.1)	6 (NC_058523.1)	7 (NC_058524.1)	mitochondria	chloroplast	total
Number of Matches:	NCBI BLAST:	5650	7147	6486	6011	6284	6110	6251	0	0	43939
Number of Matches (Sequence ID): amplicons size	In silico PCR tool:	5299	6806	6206	5617	6145	5558	6150	0	0	41781
	Triticum dicoccoides
	Chromosome (Sequence ID):	1 (LT859944.1)	2 (LT859945.1)	3 (LT859946.1)	4 (LT859947.1)	5 (LT859948.1)	6 (LT859949.1)	7 (LT859950.1)	8 (LT859951.1)	9 (LT859952.1)	10 (LT859953.1)	11 (LT859954.1)	12 (LT859955.1)	13 (LT859956.1)	14 (LT859957.1)	total
Number of Matches:	NCBI BLAST:
Number of Matches (Sequence ID): amplicons size	In silico PCR tool:	5024	5132	6285	5813	6003	5665	5089	4311	6029	5337	5012	4964	5850	4844	75358
	Vitis vinifera
	Chromosome (Sequence ID):	1 (FN597015.1)	2 (FN597017.1)	3 (FN597018.1)	4 (FN597020.1)	5 (FN597023.1)	6 (FN597024.1)	7 (FN597025.1)	8 (FN597027.1)	9 (FN597028.1)	10 (FN597030.1)	11 (FN597032.1)	12 (FN597034.1)	13 (FN597036.1)	13 (FN597037.1)	14 (FN597038.1)	15 (FN597039.1)	16 (FN597040.1)	17 (FN597043.1)	18 (FN597045.1)	19 (FN597046.1)	FN597047.1	total
Number of Matches:	NCBI BLAST:
Number of Matches (Sequence ID): amplicons size	In silico PCR tool:	40	31	50	55	2	44	49	42	75	35	37	51	39	12	82	52	55	4	18	62	78	913
